# Supplementary material for: At the Edge of Care: A Systematic Review and Thematic Synthesis of Parent and Practitioner Views and Experiences of Support for Parents with Mental Health Needs and Children’s Social Service Involvement
Source: Hindawi journal article supplement (doi:10.1155/2023/6953134), 2023-09-09
Supplement: f1 [file 6953134.f1.docx]

**S1.** Search Strategy for electronic databases

Key concepts categorised using the SPICE framework: Setting (child protection/child abuse); Perspective (parents); phenomenon of Interest (support; interventions); Context/comparison (mental health); Evaluation (qualitative; experiences).

MeSH and free-text terms were used for the search connected by Boolean operators “OR” and “AND”.

| No. | Framework | Free text terms | MeSH terms |
| --- | --- | --- | --- |
| 1 | Setting: child safeguarding | ("child protect*" OR "family court" OR "care proceeding*" OR "child* welfare" OR "custody adj3 los*" OR "custody adj5 remov*" OR ((child* OR infant* OR baby OR babies OR adolescent* OR teen*) adj5 (abus* OR neglect* OR maltreat* OR safeguard* OR "social care" OR "social work*" OR "social service*" OR remov* OR separation OR separated OR "edge of care" OR custody OR "tak* into care"))).tw  [adj5 or near5 or N5 etc] | **Medline:** exp Child Welfare/ or exp Child Abuse/ or exp Infant Welfare/ or exp Child Protective Services/  **Embase:** exp child abuse/ OR exp child welfare/ OR exp infant welfare/  **Psycinfo:** exp Child Abuse/ OR exp Child Custody/ OR exp Child Welfare/ OR exp Child Neglect/  **HMIC:** exp Child Welfare/ OR exp Child protection services/ OR Child abuse/  **CINAHL:** MH "Child Welfare+"/ OR MH "Child Abuse+" |
| 2 | Perspective: parents | (parent* OR mother* OR father* OR maternal OR paternal OR parental OR family OR families).tw | **Medline:** exp Parents/  **Embase:** exp parent/  **PsycInfo:** exp Parents/  **HMIC:** expParents/  **CINAHL:** MH "Parents+" |
| 3 | Context: mental health | ("mental health" OR "mental* disorder*" OR "mental* ill*" OR "mood disorder*" OR depress* OR schizophreni* OR bipolar OR bi-polar OR anxiety OR "personality disorder" OR posttraumatic OR post-traumatic OR PTSD OR psychosis OR psychotic OR trauma OR distress*).tw | | **Medline:** exp Mental Health/ OR exp Mental Disorders/ OR exp Depression/ OR exp Psychological Distress/ OR exp Depression, Postpartum/  **Embase:** exp mental health/ OR exp mental disease/  **PsycInfo:** exp Mental Health/ OR exp Mental Disorders/  **HMIC:** expMental health/ OR exp Mental disorders/  **CINAHL:** MH "mental health+" or MH "mental illness+" or MH "mental disorder+" or MH "psychiatric illness+" |  | | --- | --- | |
| 4 | Phenomenon of Interest: support or interventions | (service* OR support OR practice OR intervention* OR program* OR treat* OR therap* OR care OR counsel* OR training OR psychiatr* OR psycholog* OR "social work*" OR "health* professional*" OR "health* practitioner*" OR "health* personel" OR "health* worker*").tw | **Medline:** exp Mental Health Services/ OR exp Psychotherapy/ OR exp Psychiatry/ OR exp Psychology/ OR exp Counseling/ OR exp Social Work/ OR exp Health Personnel/  **Embase:** exp mental health care/ OR exp psychiatry/ OR exp psychology OR exp psychiatric treatment/ OR exp counseling/ or exp social work/ OR exp health care personnel  **PsycInfo:** exp Mental Health Services/ OR exp Psychotherapy/ OR exp Psychiatry/ OR exp Psychology/ OR exp Counseling/ OR exp Social Casework/ OR exp Health Personnel/  **HMIC:** exp Mental Health Services/ OR exp Psychiatry/ OR exp Psychology/ OR Psychology services/ OR exp Counselling/ OR exp Psychotherapy/ OR exp Social work/ OR exp health service staff/  **CINAHL:** MH "Mental health services+" OR MH "Psychiatric Care+" OR MH "Psychiatry+" OR MH "Psychotherapy+" OR MH "Social Work+" OR MH "Psychology+" OR MH " OR MH "Mental Health Personnel+" |
| 5 | Evaluation | (qualitative* OR interview* OR "thematic*" OR ethnograph* OR "grounded theory" OR phenomenolog* OR experiential OR "focus group*" OR discourse* OR "conversation analysis" OR "framework analysis" OR "narrative*" OR "lived experience*" OR account* OR hermeneutic OR "mixed method*" OR "mixed-method*" OR "semi-structure*" OR "semi structure" OR IPA OR "interpretative*" OR "content analysis" OR "guided discussion*" OR "group discussion*" OR open-ended OR "open ended").tw | **Medline:** exp Qualitative Research/  **Embase:** exp qualitative research/  **PsycInfo:** exp Qualitative Methods/  **HMIC:** exp Qualitative research/ OR exp Qualitative analysis/  **CINAHL:** MH "Qualitative Studies+" |

**S2.** Adapted Critical Appraisal Skills Programme

| **1.Aims** | **Was there a clear statement of the aims of the research?** |
| --- | --- |
| **Key questions** | - What was the goal of the R? - Why is it important? - Is it relevant? |
| **Scoring** | Score ‘Yes’ if 2+ conditions are met, otherwise score 'No'. |

| **2.Appropriateness** | **Is a qualitative methodology appropriate?** |
| --- | --- |
| **Key questions** | - Does the R seek to interpret or illuminate the actions &/or subjective experiences of Pps? - Is quali R the right methodology for addressing the R goal? |
| **Scoring** | Score ‘Yes’ if 1+ conditions are met, otherwise score ‘No’. |

| **3.Design** | **Was the research design appropriate to address the R aims?** |
| --- | --- |
| **Key questions** | - Has the Researcher (Rr) justified the R design e.g. have they discussed how they decided which method to use? |
| **Scoring** | Score ‘Yes’ if 1+ condition is met, otherwise score ‘No’. |

| **4. Recruitment** | **Was the recruitment strategy appropriate to the aims of the R?** |
| --- | --- |
| **Key questions** | - Has the Rr explained how Pps were selected - Has the Rr explained why the participants they selected were the most appropriate to provide access to the type of knowledge sought by the study? - Are there any discussions around recruitment e.g. why some people chose not to take part? |
| **Scoring** | Score ‘Yes’ if 2+ conditions are met, otherwise score 'No'. |

| **5. Data Collection** | **Was the data collected in a way that addressed the R issue?** |
| --- | --- |
| **Key questions** | - Is the setting for data collection justified? - Are the methods justified? - Is it clear how data was collected e.g. focus group, semi-structured interview etc? - Has the Rr made the methods explicit e.g. for interviews, is there an indication of how ints were conducted or did they use a topic guide? - If methods were modified during the study. If so, has the Rr explained how and why? - Is the form of data clear e.g. tape recordings, video material, notes? - Has the Rr discusssed data saturation? |
| **Scoring** | Score ‘Yes’ if 3+ conditions are met, otherwise score 'No'. |

| **6. Research relationships** | **Has the relationship between Rr and Pps been adequately considered?** |
| --- | --- |
| **Key questions** | - Has the Rr critically examined their own role, potential bias & influence during a) formulation of the RQs & b) data collection, including sample recruitment & choice of location - Has the Rr responded to events during the study & considered the implications of any changes in the R design? |
| **Scoring** | Score ‘Yes’ if 1+ conditions are met, otherwise score 'No'. |

| **7.Ethics** | **Have ethical issues been taken into consideration?** |
| --- | --- |
| **Key questions** | - Is there sufficient details of how the R was explained to Pps for the reader to assess whether ethical standards were maintained] - Has the Rr discussed issues raised by the study e.g. around informed consent or confidentiality or how they have handled the effects of the study on Pps during & after the study? - Has approval been sought from the ethics committee? |
| **Scoring** | Score ‘Yes’ if 2+ conditions are met, otherwise score 'No'. |

| **8. Data Analysis** | **Was the data analysis sufficiently rigorous?** |
| --- | --- |
| **Key questions** | - Is there is an in-depth description of the analysis process? - If thematic analysis is used: is it clear how the categories/themes were derived from the data? - Does the Rr explain how the data presented were selected from the original sample to demonstrate the analysis process? - Is sufficient data are presented to support the findings? - To what extent is contradictory data are taken into account?   *(Final question has been moved to additional Positionality section)* |
| **Scoring** | Score ‘Yes’ if 3+ conditions are met, otherwise score 'No'. |

| **9. Findings** | **Is there a clear statement of findings?** |
| --- | --- |
| **Key questions** | - Are the findings explicit? - Is there adequate discussion of the evidence both for and against the Rrs arguments? - Has the Rr discussed the credibility of their findings e.g. through triangulation, respondent validation, more than one analyst, inter-rater reliability etc? - Are the findings discussed in relation to the original RQ? |
| **Scoring** | Score ‘Yes’ if 2+ conditions are met, otherwise score 'No'. |

| **10. Value** | **How valuable is the Research?** |
| --- | --- |
| **Key questions** | - Has the Rr discussed the contribution the study makes to existing knowledge or understanding e.g. do they consider the findings in relation to current practice or policy? Or relevant R-based literature? - Have they identified new areas where R is necessary - Have the Rr discussed whether or how the findings can be transferred to other populations or considered other ways the R may be used? |
| **Scoring** | Score ‘Yes’ if 2+ conditions are met, otherwise score 'No'. |

**Additional areas 11 and 12:** Extracted from Sweeney et al. (2019)

| **11. Intersectionality** | **Have issues relating to intersectionalities been fully considered?** |
| --- | --- |
| **Key questions** | - Were attempts made to obtain a diverse sample of the population in question? (Rees 2014) - Have sample characteristics been fully described, including as a minimum sex, age and ethnicity? - Has diversity of experience been explored in the findings in relation to intersectionalities (e.g. ethnicity etc)? - Have issues relating to intersectionalities been explored in the discussion or limitation sections? |
| **Scoring** | Score ‘Yes’ if 2+ conditions are met, otherwise score 'No'. |

| **12. Service user Involvement** | **Have service users been appropriately involved in the research?** |
| --- | --- |
| **Key questions** | - Does the study use appropriate data collection methods to ensure findings are grounded in service users' experiences? - Are the methods appropriate to ensure that data analysis is grounded in service user's views? - Are service users actively involved in the design and conduct of the study? - Are service users leading or controlling the study? - Are service users involved in data analysis (e.g. member checking, reviewing transcript) |
| **Scoring** | Score ‘Yes’ if 3+ conditions are met, otherwise score 'No'. |

**Additional area 13:** Adapted from Hermaszewska et al. (2022)

| **13. Positionality** | **Is the influence of the researcher on the research, and vice- versa, addressed?** |
| --- | --- |
| **Key questions** | - Is there a statement locating the researcher culturally or theoretically? - Does the Rr critically examine their own role, potential bias & influence during analysis & selection of data & presentation? |
| **Scoring** | Score ‘Yes’ if 1+ conditions are met, otherwise score 'No'. |

Hermaszewska, S., Sweeney, A., Camminga, B., Botelle, R., Elliott, K., & Sin, J. (2022). Lived experiences of transgender forced migrants and their mental health outcomes: systematic review and meta-ethnography. *BJPsych Open*, *8*(3), e91, Article e91. <https://doi.org/10.1192/bjo.2022.51>

Sweeney, A., Clement, S., Gribble, K., Jackson, E., Carr, S., Catty, J., & Gillard, S. (2019). A systematic review of qualitative studies of adults’ experiences of being assessed for psychological therapies. *Health Expectations*, *22*(2), 133-148. <https://doi.org/https://doi.org/10.1111/hex.12844>
